# Supplementary material
Source: PubMed Central journal article supplement (PMC4111725)
Supplement: cc-13-1788-s01.pdf [file cc-13-1788-s01.pdf]

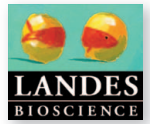

## **Supplemental Material to:**

**Jianyou Gu, Nigar D Babayeva, Yoshiaki Suwa,  
Andrey G Baranovskiy, David H Price, and Tahir H Tahirov**

**Crystal structure of HIV-1 Tat complexed with human  
P-TEFb and AFF4**

**Cell Cycle 2014; 13(11)**

**<http://dx.doi.org/10.4161/cc.28756>**

**<http://www.landesbioscience.com/journals/cc/article/28756>**

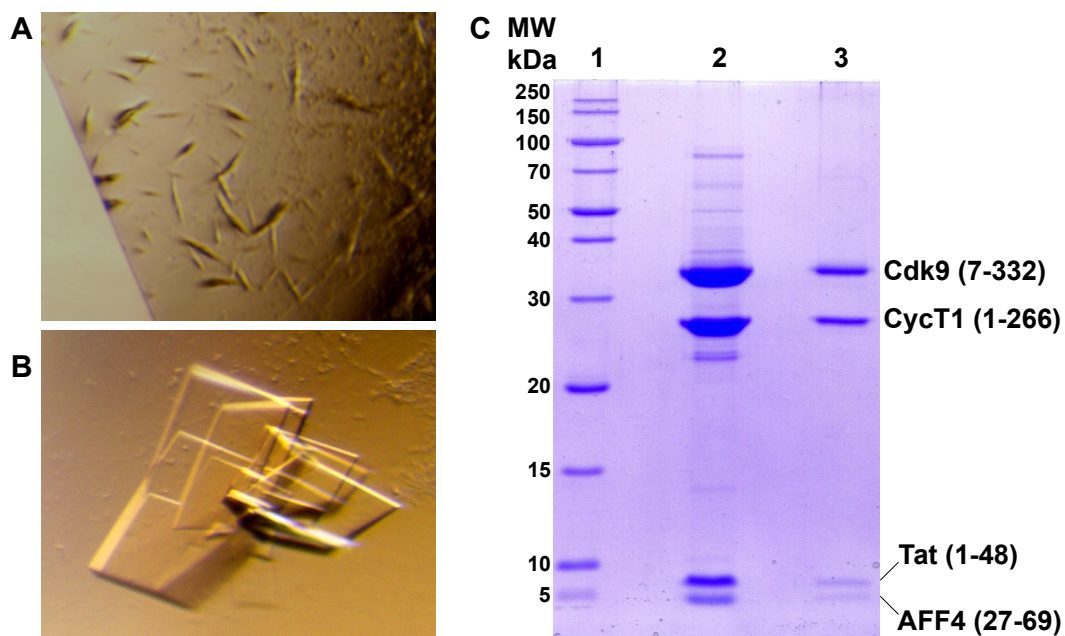

**Figure S1.** Crystals of Tat•AFF4•P-TEFb complex. Photomicrographs of **(A)** the best crystals after initial screens and **(B)** plate crystals grown in presence of  $YCl_3$ . **(C)** Composition of dissolved crystals verified by SDS-PAGE. Lane 1 is a molecular weight marker, lane 2 is a protein sample used for crystallization and lane 3 is a solution of dissolved crystals.

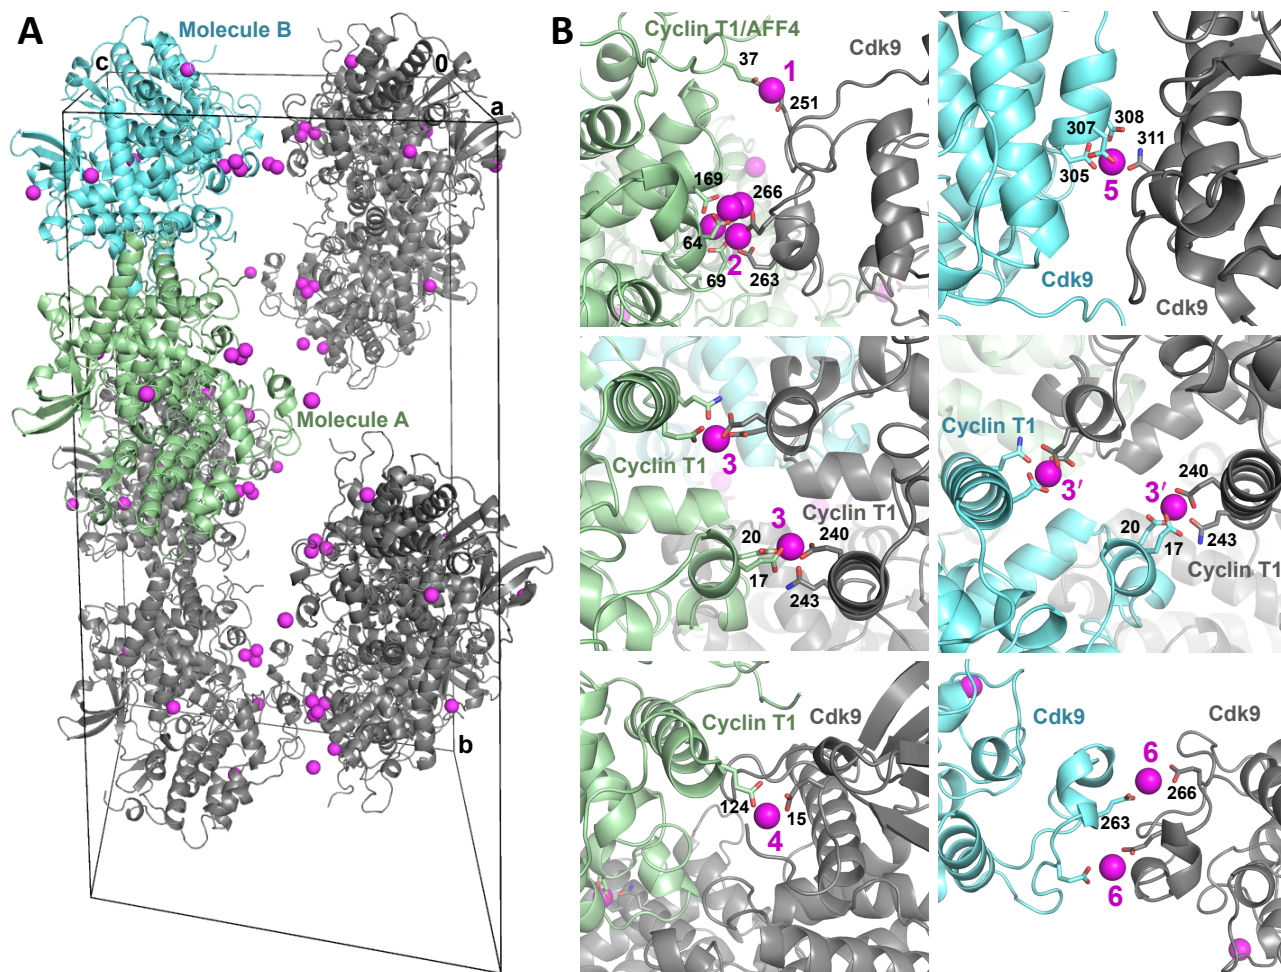

**Figure S2.** Participation of yttrium ions in Tat•AFF4•P-TEFb crystal packing. **(A)** Location of Tat•AFF4•P-TEFb molecules in the unit cell. Two independent molecules A and B in an asymmetric unit are colored in pale green and cyan, respectively. Symmetry-related molecules are in grey. Proteins are displayed as cartoons and yttrium ions are displayed as magenta spheres. **(B)** Close view of yttrium ions mediating interactions of Tat•AFF4•P-TEFb molecules A (pale green) and B (cyan) with neighboring molecules (gray) at sites 1-4 for molecule A and 5, 3' and 6 for molecule B. Only site 3 for molecule A has an equivalent site 3' for molecule B. The amino-acid residues participating in yttrium coordination and contributing subunits of Tat•AFF4•P-TEFb are labeled.

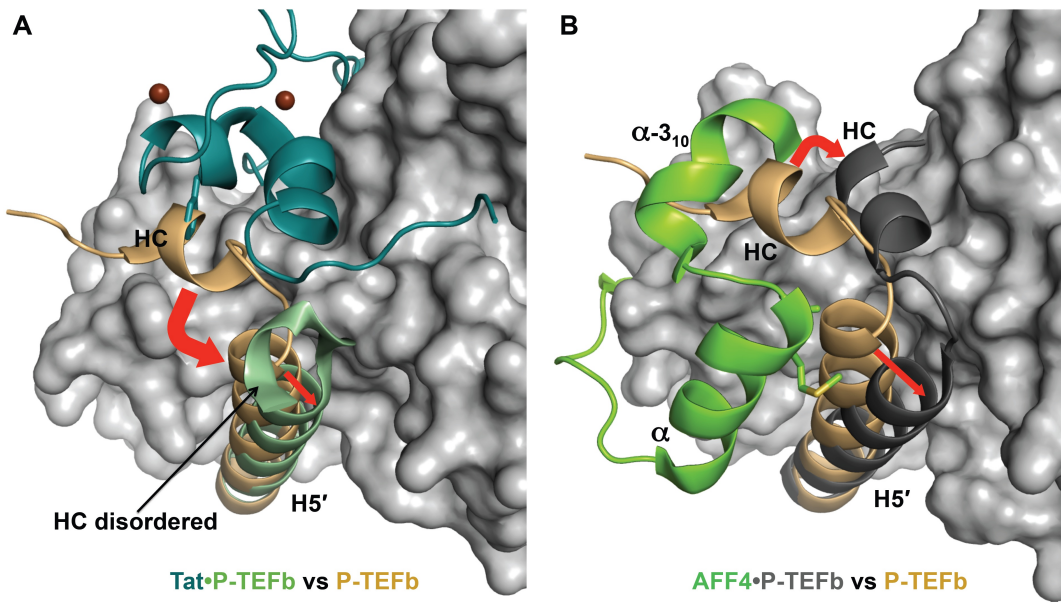

**Figure S3.** Comparison of Tat•P-TEFb and AFF4•P-TEFb structures with P-TEFb. Comparison of (A) Tat•P-TEFb with P-TEFb and (B) AFF4•P-TEFb with P-TEFb. Red arrows indicate the directions of P-TEFb structural elements shifts that occur upon binding of Tat or AFF4.

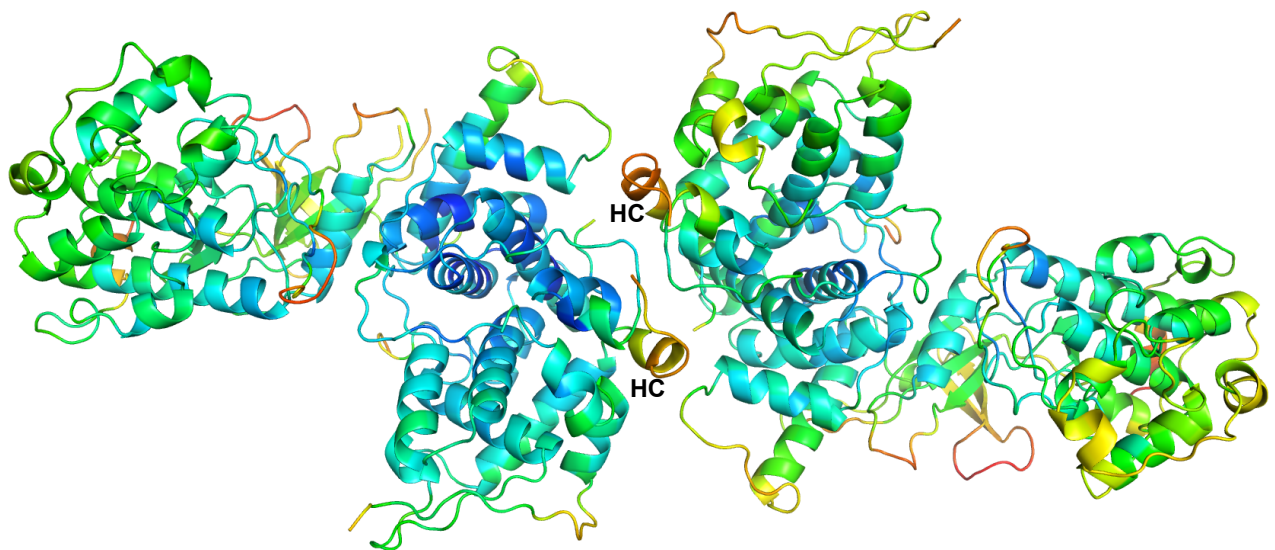

**Figure S4.** Distribution of B-factors in structure of Tat•AFF4•P-TEFb. Both independent Tat•AFF4•P-TEFb molecules are shown. The spectrum is changing from blue (the lowest B-factor value of 8 Å<sup>2</sup>) to green, yellow and red (the highest B-factor value of 140 Å<sup>2</sup>).
